# Supplementary material
Source: HighWire-hosted journal article supplement (https://meilu.jpshuntong.com/content/suppl/2016/03/22/bmj.i1062)
Supplement: bmj.i1062.pdf [file bmj.i1062.pdf]

# Vírus da Zika: manejo da infecção e do risco

Shazaad S Y Ahmad,<sup>1,2</sup> Tejal N Amin,<sup>3</sup> Andrew Ustianowski,<sup>1</sup>

<sup>1</sup>Northwest Regional Infectious Diseases Unit, North Manchester General Hospital, Pennine Acute Hospitals Trust, Manchester M8 5RB, UK

<sup>2</sup>Virology Department, Manchester Royal Infirmary, Central Manchester Foundation Trust, Manchester Academic Health Sciences Centre, Manchester M13 9WL, UK

<sup>3</sup>Department of Obstetrics and Gynaecology, University College London Hospitals NHS Foundation Trust, London, UK

Correspondência para:

A Ustianowski

Andrew.Ustianowski@pat.nhs.uk

Cite this as: *BMJ* 2016;352:i1062  
<http://dx.doi.org/10.1136/bmj.i1062>

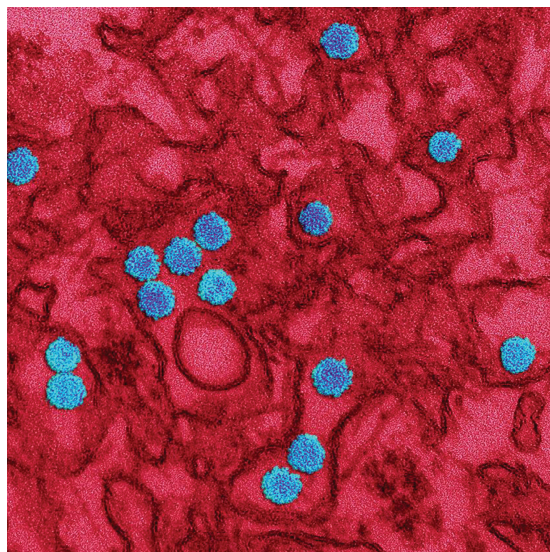

Há décadas o vírus da Zika causa uma doença febril autolimitada da África ao sudeste asiático. Recentemente, ele se disseminou pelo Pacífico e, em 2015, causou infecções pela primeira vez na América do Sul. Embora geralmente assintomática ou de pouca significância clínica em adultos, existe a preocupação de uma aparente associação entre a infecção na gestação e malformações congênitas, como a microcefalia.<sup>1,3</sup> Não temos dados para caracterizar os riscos do desenvolvimento fetal anormal ou desfechos gestacionais adversos, nem para orientar estratégias de teste. Na ausência desses, os órgãos de saúde mundiais emitiram uma orientação para médicos sobre como minimizar o risco de transmissão às mulheres grávidas ou que venham a engravidar e como monitorar fetos que possam ter sido expostos.

Apresentamos a orientação atual de manejo para profissionais de saúde em países não endêmicos, que podem orientar pessoas preocupadas com gestação e concepção antes ou depois de viagens para uma área

com o vírus da Zika. A orientação provavelmente mudará à medida que o quadro clínico e a base de conhecimento se desenvolverem, e orientações atualizadas podem ser acessadas em fontes como as apresentadas no Quadro 1.

Um artigo que acompanha este<sup>4</sup> debate a epidemiologia e as evidências do que se sabe até o momento, inclusive a possível associação com a síndrome de Guillain-Barré.

## Exemplo de situação 1

**Uma mulher de 27 anos de idade acaba de voltar da Colômbia. Durante essa viagem, ela sentiu um mal-estar leve. Ontem ela descobriu estar grávida e teme ter sido infectada pelo vírus da Zika, pois ouviu dizer que isso causa danos ao cérebro do bebê.**

Obtenha a história de viagens recentes de gestantes com medo (ou sob risco) de infecção pelo vírus da Zika, e de seus parceiros do sexo masculino. O Quadro 2 lista os países onde o vírus da Zika está presente atualmente, como a Colômbia. Não há evidências sugerindo que o vírus da Zika apresente problemas específicos para a saúde materna.

## O risco de anormalidades congênitas está mal caracterizado

O risco de infecção de um feto em desenvolvimento pelo vírus da Zika não é totalmente compreendido. O aumento recente dessas infecções coincidiu com um aparente aumento das malformações congênitas – predominantemente microcefalia, mas também ventriculomegalia, anomalias de migração celular, contraturas congênitas, feto natimorto e óbito neonatal.<sup>2,5</sup> Essas anormalidades foram amplamente descritas em relatos de caso e séries de casos. Uma ligação causal direta não foi confirmada, mas há evidências de infecção pelo vírus da Zika em placentas de fetos abortados e no cérebro de bebês com microcefalia que foram a óbito logo após o nascimento.<sup>6</sup> <sup>7</sup> Se for estabelecida causalidade, serão necessários mais dados antes de podermos dizer a uma gestante qual é a probabilidade de ela ter um filho afetado.

Dados preliminares de uma pequena série de casos sugerem que a infecção nos primeiros estágios de gestação pode oferecer o maior risco,<sup>5</sup> o que é consistente com outras infecções virais, como a rubéola. Não há tratamento disponível atualmente para corrigir ou alterar as chances de desfechos adversos fetais.

## Testes e monitoramento de gestantes ocorrem de acordo com os sintomas

Há ausência de boas evidências para orientar testes e monitoramentos. No entanto, foi emitida uma orientação especializada por órgãos internacionais.

### Quadro 1 | o que você precisa saber

- O vírus da Zika causa uma enfermidade leve com sintomas inespecíficos, podendo ser sintomática em apenas um a cada quatro casos
- A associação entre a infecção gestacional e a microcefalia não está totalmente caracterizada
- Ofereça um exame fetal mensal às gestantes com risco de infecção e debata sobre as sintomáticas com um infectologista
- Mulheres grávidas ou que planejam engravidar devem considerar não viajar para áreas afetadas
- Aconselhe homens que tiverem retornado das áreas afetadas a evitarem sexo sem proteção com parceiras em idade fértil por 28 dias, e por seis meses caso tenham apresentado infecção provável ou confirmada

**Quadro 2 | fontes de orientações atualizadas sobre o vírus da zika e manejo de pessoas expostas**

- Public Health England – [www.gov.uk/guidance/zika-virus](http://www.gov.uk/guidance/zika-virus)
- Royal College of Obstetricians and Gynaecologists – [www.rcog.org.uk/en/news/interim-clinical-guidelines-on-zika-virus-infection-and-pregnancy/](http://www.rcog.org.uk/en/news/interim-clinical-guidelines-on-zika-virus-infection-and-pregnancy/)
- National Travel Health Network and Centre (NaTHNaC), para orientações de viagem – <http://travelhealthpro.org.uk/zika-virus-update-and-advice-for-travellers-including-pregnant-women/>
- Health Protection Scotland – [www.hps.scot.nhs.uk/internationalissues/zika.aspx](http://www.hps.scot.nhs.uk/internationalissues/zika.aspx)
- Centro Europeu de Controle de Doenças – [http://ecdc.europa.eu/en/healthtopics/zika\\_virus\\_infection/Pages/index.aspx](http://ecdc.europa.eu/en/healthtopics/zika_virus_infection/Pages/index.aspx)
- Centros de Controle e Prevenção de Doenças – [www.cdc.gov/zika/](http://www.cdc.gov/zika/)
- Australian Department of Health – [www.health.gov.au/internet/main/publishing.nsf/Content/ohp-zika.htm](http://www.health.gov.au/internet/main/publishing.nsf/Content/ohp-zika.htm)
- Organização Mundial da Saúde – [www.who.int/csr/disease/zika/en/](http://www.who.int/csr/disease/zika/en/)

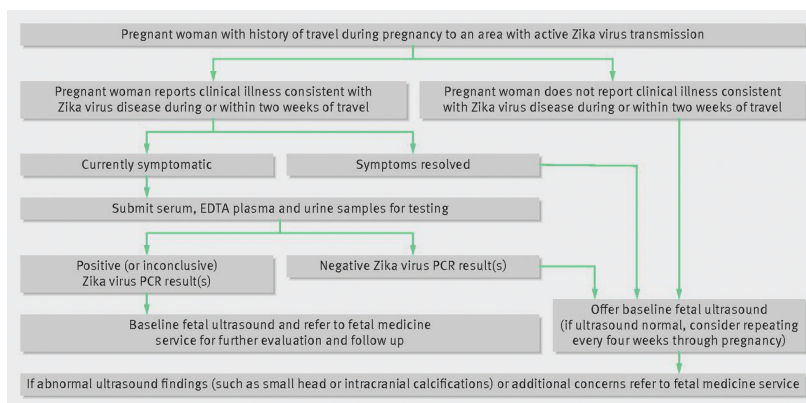

Fig 1 | Algoritmo para avaliar gestantes expostas ao vírus da Zika<sup>1</sup>

**Países com transmissão do vírus da Zika, conforme relatado pelo Centro Europeu de Controle de Doenças\***

**Transmissão crescente ou disseminada**

- Samoa Americana
- Barbados
- Brasil
- Cabo Verde
- Colômbia
- Curaçao
- República Dominicana
- Equador
- El Salvador
- Guiana Francesa
- Guadalupe
- Guatemala
- Haiti
- Honduras
- Martinica
- México
- Nicarágua
- Panamá
- Paraguai
- Porto Rico
- Samoa
- Suriname

- Venezuela
- Tonga

**Transmissão esporádica após introdução recente**

- Aruba
- Bolívia
- Bonaire
- Costa Rica
- Guiana
- Jamaica
- St. Martin
- Tailândia
- Ilhas Virgens (EUA)

**Transmissão nos últimos nove meses, mas não nos últimos dois meses**

- Fiji
- Maldivas
- Nova Caledônia
- Ilhas Salomão
- Vanuatu

\* Para ver uma lista atualizada, consulte o ECDC ([http://ecdc.europa.eu/en/healthtopics/zika\\_virus\\_infection/zika-outbreak/Pages/zika-countries-with-transmission.aspx](http://ecdc.europa.eu/en/healthtopics/zika_virus_infection/zika-outbreak/Pages/zika-countries-with-transmission.aspx))

A Figura 1 mostra a orientação do Reino Unido para gestantes que viajaram a uma área com transmissão conhecida do vírus da Zika durante a gestação.<sup>1</sup> Essencialmente, todas as gestantes que viajaram para uma área afetada pelo vírus da Zika devem ser submetidas a uma ultrassonografia fetal basal, com seu caso sendo debatido com uma equipe secundária de cuidados obstétricos. Se o resultado for normal, ofereça ultrassonografias a cada quatro semanas durante todo o período gestacional. A microcefalia e as outras anormalidades neurológicas descritas podem não estar aparentes nos exames até 20 semanas de gestação ou início do terceiro trimestre. Logisticamente, testes e cuidados podem ser feitos por equipes obstétricas ou como parte de cuidados conjuntos com as parteiras ou com o médico de atenção primária.

A detecção de anormalidades neurológicas, como baixa circunferência cefálica (mais de dois desvios-padrão abaixo da média para a idade gestacional) ou calcificações intracranianas, justifica encaminhamento para uma unidade de medicina fetal para investigação adicional. Aqui, causas alternativas de microcefalia – como outras infecções congênitas, anormalidades cromossômicas, síndromes genéticas indefinidas, exposição a substâncias teratogênicas e doenças metabólicas maternas – também serão levadas em consideração.

Para gestantes que apresentam sintomas clínicos compatíveis com infecção pelo vírus da Zika (consulte o Quadro 3) quando estão em uma área afetada pelo vírus da Zika, ou até duas semanas após o retorno, deve-se considerar o teste de infecção pelo vírus da Zika e por outras doenças associadas a viagem pertinentes ao país visitado. Mulheres assintomáticas, mas que tenham acabado de retornar, devem ser orientadas a buscar cuidados médicos caso desenvolvam sintomas consistentes com o vírus da Zika nas duas semanas seguintes.

**A interpretação dos testes de vírus da Zika é complicada**

Devem-se debater com infectologistas todos os pacientes submetidos a testes para infecção pelo vírus da Zika, e a estratégia ideal de testes para esta e qualquer outra infecção deve ser determinada em conjunto. O teste de primeira linha e o diagnóstico definitivo ocorrem pela identificação do RNA do vírus da Zika por reação em cadeia da polimerase. O vírus

**Quadro 3 | Sintomas clínicos consistentes com a infecção pelo vírus da Zika<sup>1</sup>**

Suspeite de infecção pelo vírus da Zika em pessoas que apresentem quaisquer dos sintomas a seguir e tenham história relevante de viagens recentes:

- Febre baixa
- Artralgia
- Exantema maculopapular (por vezes pruriginoso)
- Conjuntivite
- Cefaleia
- Mialgias
- Dor ocular

pode permanecer detectável no sangue nos cinco primeiros dias de infecção e, na urina, por provavelmente até duas semanas.<sup>8</sup> Use o teste em pessoas com sintomas ativos ou recentes combinado com exames laboratoriais virológicos locais. (No Reino Unido, geralmente se colhe uma amostra de soro e sangue com EDTA, e também urina em recipiente estéril, caso a paciente esteja grávida.)

Se o RNA do vírus da Zika for detectado, a orientação do Reino Unido sugere que a mulher receba encaminhamento direto a especialistas em medicina fetal. No entanto, um resultado negativo de reação em cadeia da polimerase não é capaz de excluir infecção (especialmente se a amostra for enviada vários dias após o início dos sintomas), devendo-se oferecer, nessa situação, o acompanhamento com ultrassonografias de rastreamento em intervalos de quatro semanas.

Os Estados Unidos usam o ensaio IgM para vírus da Zika, e a Austrália está usando ensaios IgM e IgG na tentativa de detectar infecções, inclusive aquelas fora da janela de testes para RNA viral. Os Centros de Controle e Prevenção de Doenças dos EUA defendem que todas as gestantes que voltem de áreas afetadas façam teste do vírus da Zika,<sup>9</sup> com testes de reação em cadeia da polimerase, se sintomáticas, e testes sorológicos, se assintomáticas.

No entanto, a sensibilidade, a especificidade e as aplicações desses testes sorológicos (IgG ou IgM) não estão estabelecidas. Atualmente eles não são recomendados no Reino Unido, embora possa ser sugerível armazenar uma amostra de soro para possíveis testes futuros (depois que os ensaios tiverem sido estabelecidos e validados).

Se for obtida uma amostra de líquido amniótico, ela também pode ser testada por reação em cadeia da polimerase, mas a utilidade desse teste não está firmemente estabelecida até o momento.

### Exemplo de situação 2

**Um homem de 28 anos de idade voltou do Brasil e apresenta sintomas tipo gripe. Ele teme ter contraído o vírus da Zika. E não sabe se deve ir trabalhar. Ele também ouviu falar que é possível ocorrer transmissão sexual e está preocupado com sua parceira.**

#### Debata com infectologistas locais sobre todos aqueles com sintomas e história relevante de viagens recentes

Estima-se que quatro em cada cinco pessoas com infecção pelo vírus da Zika sejam assintomáticas; entre aquelas que desenvolvem sintomas, estes costumam ser inespecíficos (Quadro 3). Assim, é importante que o caso de um indivíduo assintomático, como o descrito acima, seja discutido com um infectologista local, de forma a permitir avaliação quanto a outras possíveis infecções, como malária e dengue.

A infecção por Zika não é uma doença de notificação compulsória no Reino Unido, mas é em outros países, como EUA e Austrália.

### A Zika é transmitida por um tipo de mosquito, mas também possivelmente por sêmen ou hemoderivados

Não há necessidade de faltar no trabalho nem evitar outras atividades da vida diária. O vírus da Zika é transmitido entre seres humanos por um vetor, o mosquito *Aedes*. Esses mosquitos não são encontrados no Reino Unido, norte da Europa, Canadá, noroeste dos Estados Unidos, Rússia, nordeste da Ásia e sul da Austrália, mas são disseminados em boa parte do resto do mundo.

É possível que o vírus da Zika seja transmitido entre seres humanos por outras vias. Existe um risco teórico de transmissão por sangue ou hemoderivados infectados.<sup>10</sup> O vírus foi identificado no sêmen de dois homens infectados com o vírus da Zika<sup>11,12</sup> e, até o momento, houve dois relatos de transmissão sexual por viajantes do sexo masculino a suas parceiras fora de áreas endêmicas (somente um desses casos está publicado no momento<sup>13</sup>). Não se sabe quanto tempo após a infecção o vírus permanece detectável, ou potencialmente infeccioso, no sêmen. Não existem evidências de transmissão sexual de mulheres para homens.

As orientações do Reino Unido e da Europa determinam que homens com suspeita ou confirmação de infecção usem preservativos com suas parceiras (caso ela esteja grávida ou correndo risco de gravidez) por seis meses.<sup>1,2</sup> Abstenção sexual é outra opção. Os EUA orientam a praticar abstinência ou usar preservativos durante toda a gestação, caso a parceira esteja grávida, mas não especifica um período em caso de ausência de gravidez.<sup>14</sup>

Para homens assintomáticos durante viagens a áreas afetadas e por duas semanas após o retorno, a orientação do Reino Unido e da Europa determina que se considere o uso de preservativos por 28 dias após o retorno, caso a parceira esteja grávida ou correndo risco de gravidez.<sup>1,2</sup> As diretrizes dos EUA não especificam um período para homens assintomáticos. A orientação atual é que se utilizem preservativos para sexo vaginal, oral e anal. Isso deve ser debatido com os pacientes.

Esses períodos são baseados em poucas evidências. Sugeriu-se que a janela de 28 dias preveja um período de incubação de 14 dias e um período virêmico de 14 dias, mesmo em pessoas assintomáticas. A janela de seis meses pode mudar quando forem estabelecidos dados de longo prazo sobre transmissão seminal.

Pacientes que planejam doar sangue, tecido ou sêmen devem declarar viagem recente às áreas afetadas (e resultados do teste do vírus da Zika, quando conhecidos) antes da doação.

### Exemplo de situação 3

**Uma mulher de 32 anos está planejando uma viagem de trabalho ao Brasil. Ela não está grávida, mas pensa em começar uma família em breve, e pergunta por quanto tempo os riscos podem persistir e como minimizar a chance de infecção.**

#### O risco para futuras gestações é desconhecido

Existem poucos dados para dar suporte a orientações quanto à duração do risco após uma exposição em



potencial, mas tal orientação já foi emitida. Existe consenso nas orientações do Reino Unido,<sup>1</sup> Europa,<sup>2</sup> EUA<sup>3</sup> Austrália<sup>15</sup> de que mulheres em idade fértil que viajam para áreas afetadas pelo Zika devem usar um método confiável de contracepção e evitar engravidar. Gestantes devem ser enfaticamente aconselhadas a evitar esse tipo de viagem, se possível.

Ao voltar de áreas endêmicas, a orientação no Reino Unido é evitar engravidar por mais 28 dias.<sup>1</sup> Acredita-se, embora haja poucas evidências, que um feto concebido após a mulher ter eliminado o vírus não correria risco de malformações congênitas, nem deveria haver riscos a futuras gestações.<sup>3</sup> Não existe local conhecido de transmissão de prazo mais longo (como no sêmen) em mulheres.

### Oriente todos os viajantes sobre como evitar picadas de mosquito

Se a viagem a uma área afetada for inevitável, os profissionais da saúde deve informar integralmente ao indivíduo como evitar picadas de mosquito. Mosquitos *Aedes* picam do nascer do sol até o por do sol (à noite, somente em casos raros); portanto, incentivamos a adoção de medidas preventivas 24 horas ao dia. Devem-se usar repelentes de insetos à base de DEET, aplicados com frequência, e outras medidas também devem ser buscadas (consulte o Quadro 4).

**Colaboradores:** Todos os autores colaboraram com esboços e revisões do manuscrito e aprovaram a versão final para publicação. AU é o responsável.

**Conflitos de interesses:** Nós lemos e entendemos a política do BMJ sobre conflitos de interesses e não temos nenhum interesse pertinente a declarar.

**Procedência e revisão por pares:** Validada; revisão por pares externos.

- Royal College of Obstetricians and Gynaecologists, Royal College of Midwives, Public Health England, et al. Interim RCOG/RCM/PHE/HPS clinical guidelines: Zika virus infection and pregnancy information for healthcare professionals. 2016. [www.rcog.org.uk/en/news/interim-clinical-guidelines-on-zika-virus-infection-and-pregnancy](http://www.rcog.org.uk/en/news/interim-clinical-guidelines-on-zika-virus-infection-and-pregnancy)
- European Centre for Disease Prevention and Control. Rapid risk assessment. Zika virus disease epidemic: potential association with microcephaly and Guillain-Barré syndrome (2nd update). 2016. [http://ecdc.europa.eu/en/healthtopics/zika\\_virus\\_infection/Pages/index.aspx](http://ecdc.europa.eu/en/healthtopics/zika_virus_infection/Pages/index.aspx)
- Petersen EE, Staples JE, Meaney-Delman D, et al. Interim guidelines for pregnant women during a Zika virus outbreak—United States, 2016. *MMWR Morb Mortal Wkly Rep* 2016;65:30-3. doi:10.15585/mmwr.mm6502e1. PubMed
- Basarab M, Bowman C, Aarons EJ, Cropley I. Zika virus. *BMJ* 2016;352:i1049. doi:10.1136/bmj.i1049
- Schuler-Faccini L, Ribeiro EM, Feitosa IML, et al; Brazilian Medical Genetics Society—Zika Embryopathy Task Force. Possible association between Zika virus infection and microcephaly—Brazil, 2015. *MMWR Morb Mortal Wkly Rep* 2016;65:59-62. doi:10.15585/mmwr.mm6503e2. PubMed
- Martines RB, Bhatnagar J, Keating MK, et al. Notes from the Field: Evidence of Zika virus infection in brain and placental tissues from two congenitally infected newborns and two fetal losses—Brazil, 2015. *MMWR Morb Mortal Wkly Rep* 2016;65:159-60. PubMed doi:10.15585/mmwr.mm6506e1
- Mlakar J, Korva M, Tul N, et al. Zika virus associated with microcephaly. *N Engl J Med* 2016;10. doi:10.1056/NEJMoa1600651. PubMed
- Gourinat A-C, O'Connor O, Calvez E, Goarant C, Dupont-Rouzeyrol M. Detection of Zika virus in urine. *Emerg Infect Dis* 2015;21:84-6. doi:10.3201/eid2101.140894. PubMed
- Oduyebo T, Petersen EE, Rasmussen SA, et al. Update: interim guidelines for health care providers caring for pregnant women and women of reproductive age with possible Zika virus exposure—United States, 2016. *MMWR Morb Mortal Wkly Rep* 2016;65:122-7. doi:10.15585/mmwr.mm6505e2. PubMed
- Musso D, Nhan T, Robin E, et al. Potential for Zika virus transmission through blood transfusion demonstrated during an outbreak in French Polynesia, November 2013 to February 2014. *Euro Surveill* 2014;19:14-6. PubMed doi:10.2807/1560-7917.ES2014.19.14.20761
- Musso D, Roche C, Robin E, Nhan T, Teissier A, Cao-Lormeau VM. Potential sexual transmission of Zika virus. *Emerg Infect Dis* 2015;21:359-61. doi:10.3201/eid2102.141363. PubMed
- Atkinson B, Hearn P, Afrough B, et al. Detection of Zika virus in semen. [letter] *Emerg Infect Dis* 2016. doi:10.3201/eid2205.160107
- Foy BD, Kobylinski KC, Chilson Foy JL, et al. Probable non-vector-borne transmission of Zika virus, Colorado, USA. *Emerg Infect Dis* 2011;17:880-2. doi:10.3201/eid1705.101939. PubMed
- Oster AM, Brooks JT, Stryker JE, et al. Interim guidelines for prevention of sexual transmission of Zika virus—United States, 2016. *MMWR Morb Mortal Wkly Rep* 2016;65:120-1. doi:10.15585/mmwr.mm6505e1. PubMed
- Australian Government Department of Health. Zika virus—information for clinicians and public health practitioners. 2016. [www.health.gov.au/internet/main/publishing.nsf/Content/ohp-zika-health-practitioners.htm?/eref&gt;](http://www.health.gov.au/internet/main/publishing.nsf/Content/ohp-zika-health-practitioners.htm?/eref&gt;)

#### Quadro 4 | Como evitar picadas de mosquito

- Usar camisa de manga longa e calça comprida
- Hospedar-se em locais com tela nas portas e janelas, mantendo os mosquitos de fora, ou deixar as janelas fechadas e ligar o ar condicionado
- Dormir em uma cama com mosquiteiro.
- Usar repelentes de insetos que contenham 50% de DEET (*N,N*-dietil-*m*-toluamida) (considerado seguro na gestação)
- Aplicar o DEET após o protetor solar
- Tratar a roupa com permetrina ou comprar itens já tratados com permetrina. Consulte as informações do produto para determinar por quanto tempo a proteção dura
- O folheto informativo da Public Health England, “Mosquito bite avoidance for travellers”, pode ser baixado do endereço [www.gov.uk/government/publications/mosquito-bite-avoidance-for-travellers](http://www.gov.uk/government/publications/mosquito-bite-avoidance-for-travellers)

#### De que forma pacientes foram envolvidos na criação deste artigo?

O *BMJ* não solicitou aos autores que envolvessem pacientes na criação deste artigo.
